# Supplementary material for: A flexible electrochemical glucose sensing platform based on an electrospun PVA mat covered with in situ grown silver nanoparticles and a mixed self-assembled monolayer of glucose oxidase and ferrocene
Source: Royal Society of Chemistry journal article supplement (doi:10.1039/d3an00553d), 2023-01-01
Supplement: d3an00553d1.pdf [file d3an00553d1.pdf]

## Supporting information

A Flexible Electrochemical Glucose Sensing Platform Based on Electrospun PVA Mat Covered with in-situ Grown Silver Nanoparticles and a Mixed Self-assembled Monolayer of Glucose Oxidase and Ferrocene

Yu Wang<sup>a,d#</sup>, Qiyang Wang<sup>c#</sup>, Guobi Chai<sup>a,b</sup>, Wu Fan<sup>a,b</sup>, Qingzhao Shi<sup>a,b</sup>, Wenfen Zhang<sup>b,d</sup>, Jian Mao<sup>a,b</sup>, Jianping Xie<sup>a,b</sup>, Ronghan Wei<sup>c\*</sup>, Qidong Zhang<sup>a,b\*</sup>

<sup>a</sup>Food Laboratory of Zhongyuan, Flavour Science Research Center of Zhengzhou University, Kexue Avenue 100, Zhengzhou, Henan 450001, P. R. China.

<sup>b</sup>Zhengzhou Tobacco Research Institute of CNTC, Fengyang Road 2, Zhengzhou, Henan 450001, P. R. China.

<sup>c</sup>College of Mechanics and Safety Engineering, Zhengzhou University, Kexue Avenue 100, Zhengzhou, Henan 450001, P. R. China.

<sup>d</sup>College of Chemistry, Zhengzhou University, Kexue Avenue 100, Zhengzhou, Henan 450001, P. R. China.

## CONTENTS

|                                                                                                                                                                                                                                                                                                   |    |
|---------------------------------------------------------------------------------------------------------------------------------------------------------------------------------------------------------------------------------------------------------------------------------------------------|----|
| <b>Fig.S1.</b> Diameter distribution of PVA fibers (a) before cross-linking; (b) after cross-linking.....                                                                                                                                                                                         | S3 |
| <b>Fig.S2.</b> SEM and EDX of PVA/nano-Ag/Au (a) SEM; (b-d) EDX mapping with elemental analysis; (e) EDX spectrum.....                                                                                                                                                                            | S3 |
| <b>Fig.S3.</b> CV curves in 5 mM $[\text{Fe}(\text{CN})_6]^{3-}/[\text{Fe}(\text{CN})_6]^{4-}$ at different scan rates of (a) Au; (b) PVA/Au; (c) PVA/nano-Ag/Au; insert: calibration plot of peak current versus square root of scan rate; (d) the effective areas calculated of electrodes..... | S4 |
| <b>Fig.S4.</b> The current change of PVA/nano-Ag/Au/Fc-GOD in 0.2-0.4 mM glucose solution under different applied potentials by CV.....                                                                                                                                                           | S4 |
| <b>Fig.S5.</b> Repeatability of glucose detection performance with PVA/nano-Ag/Au/Fc-GOD in 0.2 mM glucose within different storage durations. (a) during 6 h, 1/h; (b) during 5 days, 1/day .....                                                                                                | S5 |
| <b>Fig.S6.</b> Plot of linear fit of current to glucose concentration in artificial sweat; insert: chronoamperometric response to the increasing glucose concentrations from 0.2 mM to 7.0 mM.....                                                                                                | S5 |
| <b>Table S1.</b> Comparison of analytical characteristics of several glucose-sensing electrodes.....                                                                                                                                                                                              | S6 |

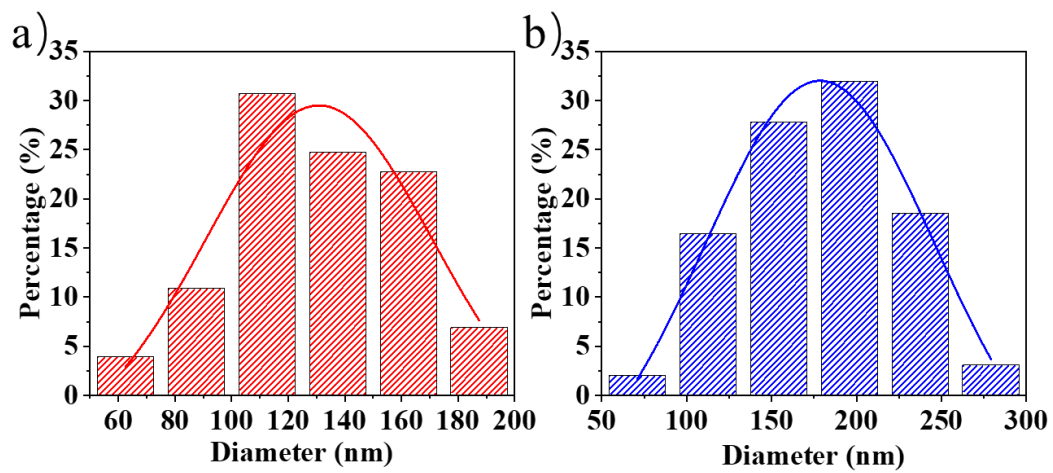

**Fig.S1.** Diameter distribution of PVA fibers (a) before cross-linking; (b) after cross-linking.

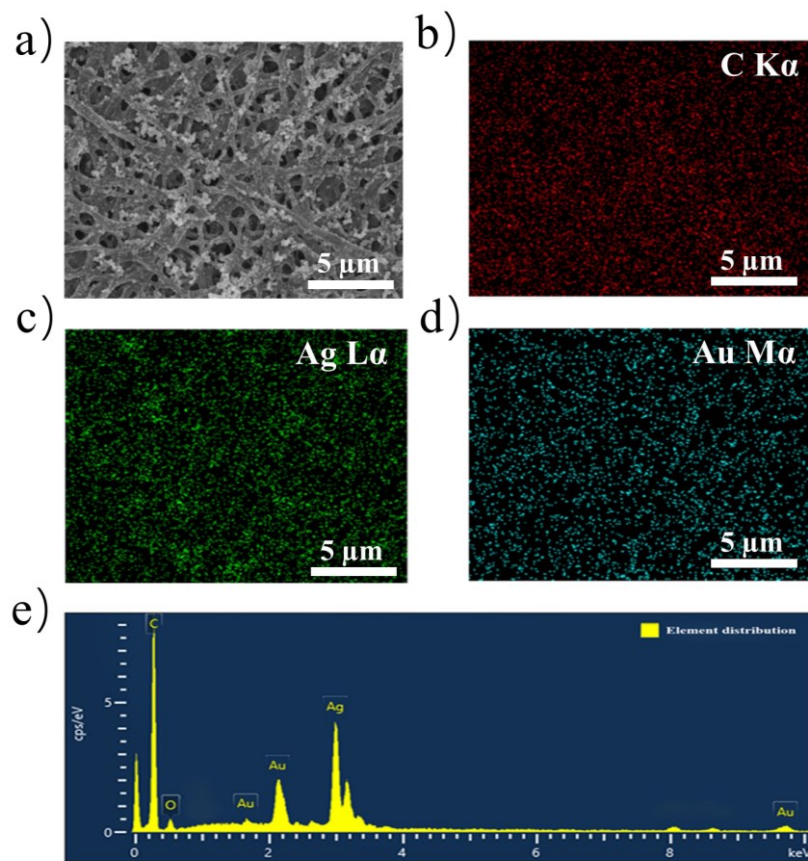

**Fig.S2.** SEM and EDX of PVA/nano-Ag/Au (a) SEM; (b-d) EDX mapping with elemental analysis; (e) EDX spectrum.

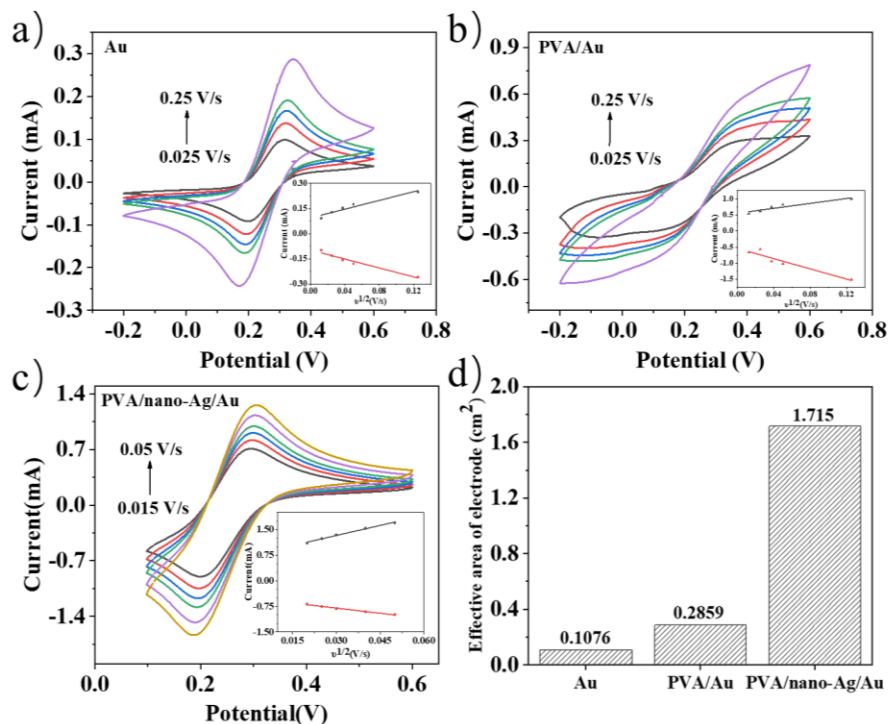

**Fig.S3.** CV curves in 5 mM  $[\text{Fe}(\text{CN})_6]^{3-}/[\text{Fe}(\text{CN})_6]^{4-}$  at different scan rates of (a) Au; (b) PVA/Au; (c) PVA/nano-Ag/Au; insert: calibration plot of peak current versus square root of scan rate; (d) the effective areas calculated of electrodes.

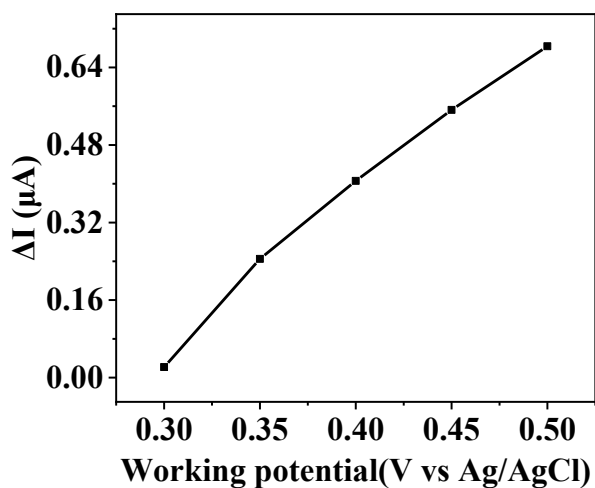

**Fig.S4.** The current change of PVA/nano-Ag/Au/Fc-GOD in 0.2-0.4 mM glucose solution under different applied potentials by CV.

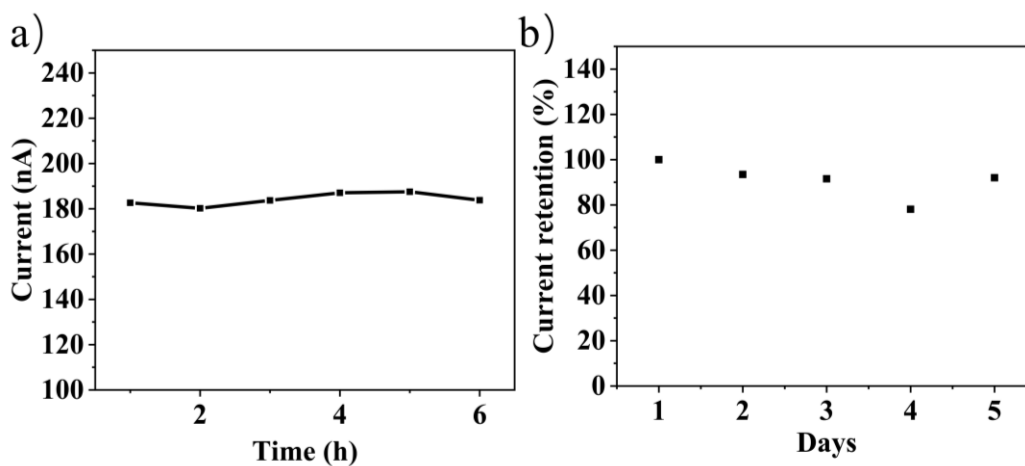

**Fig.S5.** Repeatability of glucose detection performance with PVA/nano-Ag/Au/Fc-GOD in 0.2 mM glucose within different storage durations. (a) during 6 h, 1/h; (b) during 5 days, 1/day.

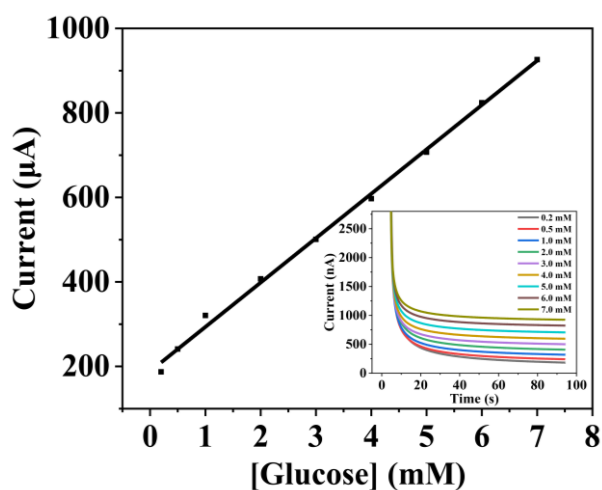

**Fig.S6.** Plot of linear fit of current to glucose concentration in artificial sweat; insert: chronoamperometric response to the increasing glucose concentrations from 0.2 mM to 7.0 mM.

**Table S1.** Comparison of analytical characteristics of several glucose-sensing electrodes.

| <b>Modified Electrode</b>                         | <b>Linear Range (mM)</b> | <b>LOD (mM)</b>       | <b>Stretchability</b> | <b>Ref.</b> |
|---------------------------------------------------|--------------------------|-----------------------|-----------------------|-------------|
| PET/PMMA/Au/GOx                                   | >1.0                     | 0.33                  | Yes                   | 11          |
| GOD/SnO <sub>2</sub> -NF/CH/PB/GE                 | 0.5-5.0                  | 0.05                  | No                    | 15          |
| Electrospun Nylon-PPy-MIPs                        | 0.1-1                    | 0.1                   | No                    | 16          |
| Mn <sub>2</sub> O <sub>3</sub> /Ag nanofibers/GOx | up to 1.11               | 1.73×10 <sup>-3</sup> | Yes                   | 17          |
| Carbon film/BSA/Fc/GOx                            | 0.05-2.7                 | 0.066                 | No                    | 25          |
| Au/PB/GOx/Ch fiber                                | 0-0.5                    | 6×10 <sup>-3</sup>    | Yes                   | 43          |
| PVA/nano-Ag/Au/Fc-GOD                             | 0.2-7.0                  | 0.038                 | Yes                   | This work   |
